# Supplementary material
Source: HighWire-hosted journal article supplement (https://bmjopen.bmj.com/content/14/8/e083060)
Supplement: inline-supplementary-material-6 [file inline-supplementary-material-6.pdf]

Supplemental material 5. Additional tables

Additional table 1. Characteristics of participants for cross-sectional surveys in Lao PDR

| Characteristics                                              | Malaria<br>program<br>stakeholder<br>(N=28) | Malaria<br>service<br>providers<br>(N=37) | Overall<br>(N=65) |
|--------------------------------------------------------------|---------------------------------------------|-------------------------------------------|-------------------|
| <b>Province, n (%)</b>                                       |                                             |                                           |                   |
| Huaphan                                                      | 0                                           | 4 (10.8)                                  | 4 (6.2)           |
| Khammouane                                                   | 10 (35.7)                                   | 21 (56.8)                                 | 31 (47.7)         |
| Luangprabang                                                 | 10 (35.7)                                   | 5 (13.5)                                  | 15 (23.1)         |
| Savannakhet                                                  | 8 (28.6)                                    | 7 (18.9)                                  | 15 (23.1)         |
| <b>District, n (%)*</b>                                      |                                             |                                           |                   |
| Sopbao                                                       | 0                                           | 4 (10.8)                                  | 4 (6.2)           |
| Boulapha                                                     | 4 (14.3)                                    | 14 (37.8)                                 | 18 (27.7)         |
| Thakhek                                                      | 2 (7.1)                                     | 7 (18.9)                                  | 9 (13.8)          |
| Phoukhoun                                                    | 9 (32.1)                                    | 5 (13.5)                                  | 14 (21.5)         |
| Vilabouli                                                    | 8 (28.6)                                    | 7 (18.9)                                  | 15 (23.1)         |
| <b>Age in years, median (IQR)</b>                            | 53 (36, 58)                                 | 36 (30, 39)                               | 38 (32, 53)       |
| <b>Sex, n (%)</b>                                            |                                             |                                           |                   |
| Male                                                         | 23 (82.1)                                   | 15 (40.5)                                 | 38 (58.5)         |
| Female                                                       | 5 (17.9)                                    | 22 (59.5)                                 | 27 (41.5)         |
| <b>Highest education level, n (%)</b>                        |                                             |                                           |                   |
| No formal education                                          | 0                                           | 1 (2.7)                                   | 1 (1.5)           |
| Primary school level                                         | 0                                           | 6 (16.2)                                  | 6 (9.2)           |
| Lower-secondary school level                                 | 1 (3.6)                                     | 10 (27.0)                                 | 11 (16.9)         |
| Upper-secondary school level                                 | 5 (17.9)                                    | 4 (10.8)                                  | 9 (13.8)          |
| Diploma or degree holder                                     | 22 (78.6)                                   | 16 (43.2)                                 | 38 (58.5)         |
| <b>Years of experience in current position, median (IQR)</b> | 10 (4, 15)                                  | 4 (3, 8)                                  | 5 (3, 12.5)       |

\* Missing values present.

**Additional table 2. Characteristics of participants for focus group discussions and semi-structured interviews in Lao PDR**

| Characteristics                                              | Malaria<br>program<br>stakeholder | Malaria<br>service<br>providers | Mobile and<br>migrant<br>population |
|--------------------------------------------------------------|-----------------------------------|---------------------------------|-------------------------------------|
| <b>Number of discussion and interviews</b>                   |                                   |                                 |                                     |
| Focus group discussions                                      | 5                                 | 6                               | 4                                   |
| Semi-structured interviews                                   | 4                                 | 0                               | 0                                   |
| <b>Number of participants</b>                                | 18                                | 24                              | 20                                  |
| <b>Province, n (%)</b>                                       |                                   |                                 |                                     |
| Huaphan                                                      | 4 (22.2)                          | 6 (25.0)                        | 0                                   |
| Khammouane                                                   | 5 (27.8)                          | 10 (41.7)                       | 3 (15.0)                            |
| Luangprabang                                                 | 5 (27.8)                          | 8 (33.3)                        | 6 (30.0)                            |
| Savannakhet                                                  | 4 (22.2)                          | 0                               | 11 (55.0)                           |
| <b>Age in years, median (IQR)*</b>                           | 45 (35, 55)                       | 37 (32, 49)                     | 37 (31, 45)                         |
| <b>Sex, n (%)</b>                                            |                                   |                                 |                                     |
| Male                                                         | 14 (77.8)                         | 11 (45.8)                       | 14 (70.0)                           |
| Female                                                       | 4 (22.2)                          | 13 (54.2)                       | 6 (30.0)                            |
| <b>Years of experience in current position, median (IQR)</b> | 8 (3, 12)                         | 4 (3, 10)                       | NA                                  |

\* Missing values present.  
NA=Not applicable

**Additional table 3. Practice of case notification and case investigation in Lao PDR as reported by surveyed participants**

| Practice of case notification and case investigation                         | Malaria program stakeholder (N=28) | Malaria service providers (N=37) | Overall (N=65) |
|------------------------------------------------------------------------------|------------------------------------|----------------------------------|----------------|
| <b>Reporting method for malaria positive cases, n (%) *</b>                  |                                    |                                  |                |
| Paper-based reporting                                                        | 24 (85.7)                          | 21 (56.8)                        | 45 (69.2)      |
| Phone call                                                                   | 13 (46.4)                          | 28 (75.7)                        | 41 (63.1)      |
| Electronic reporting using mobile phone/tablet                               | 25 (89.3)                          | 7 (18.9)                         | 32 (49.2)      |
| Messaging through mobile application (e.g., WhatsApp)                        | 4 (14.3)                           | 6 (16.2)                         | 10 (15.4)      |
| <b>Supervisor or personnel in-charge for case investigation, n (%) * †</b>   |                                    |                                  |                |
| District Malaria Control Unit/ District Health Office                        | 20 (71.4)                          | 12 (32.4)                        | 32 (49.2)      |
| Health Center                                                                | 11 (39.3)                          | 9 (24.3)                         | 20 (30.8)      |
| Province Malaria Control Unit/ Provincial Center                             | 8 (28.6)                           | 1 (2.7)                          | 9 (13.8)       |
| Village Health Volunteer                                                     | 8 (28.6)                           | 1 (2.7)                          | 9 (13.8)       |
| Rapid response team                                                          | 5 (17.9)                           | 0                                | 5 (7.7)        |
| CDC/ District Epidemiology Team                                              | 5 (17.9)                           | 0                                | 5 (7.7)        |
| Laboratory staff                                                             | 4 (14.3)                           | 0                                | 4 (6.2)        |
| Malaria Health Workers/ Malaria Unit                                         | 4 (14.3)                           | 0                                | 4 (6.2)        |
| <b>Involvement of malaria service providers in case investigation, n (%)</b> |                                    |                                  |                |
| Always                                                                       | NA                                 | 18 (48.6)                        | NA             |
| Sometimes                                                                    | NA                                 | 5 (13.5)                         | NA             |
| Never                                                                        | NA                                 | 14 (37.8)                        | NA             |

\* Multiple responses were allowed.

† Missing values present.

**Additional table 4. Implementation of case investigation in Lao PDR as reported by surveyed participants**

| Procedures undertaken during a case investigation*, n (%)            | Malaria program stakeholder (N=28) | Malaria service providers (N=37) | Overall (N=65) |
|----------------------------------------------------------------------|------------------------------------|----------------------------------|----------------|
| Visiting the index case                                              | 28 (100.0)                         | 26 (70.3)                        | 54 (83.1)      |
| Checking malaria preventive measures used by the index case          | 28 (100.0)                         | 27 (73.0)                        | 55 (84.6)      |
| Educating the index case on malaria prevention                       | 28 (100.0)                         | 27 (73.0)                        | 55 (84.6)      |
| Collecting travel history of the index case <sup>†</sup>             | 28 (100.0)                         | 26 (70.3)                        | 54 (83.1)      |
| Collecting travel history within the residing district <sup>†</sup>  | 28 (100.0)                         | 25 (67.6)                        | 53 (81.5)      |
| Collecting travel history outside the residing district <sup>†</sup> | 23 (82.1)                          | 23 (62.2)                        | 46 (70.8)      |
| Collecting travel history outside the residing country <sup>†</sup>  | 20 (71.4)                          | 18 (48.6)                        | 38 (58.5)      |
| Mapping the location of the index case <sup>†</sup>                  | 17 (60.7)                          | 21 (56.8)                        | 38 (58.5)      |

\* Multiple responses were allowed.

<sup>†</sup> Missing values present.

**Additional table 5. Foci response activities in Lao PDR as reported by surveyed participants**

| Foci response activities*                                                             | Malaria program stakeholder (N=28) | Malaria service providers (N=37) | Overall (N=65) |
|---------------------------------------------------------------------------------------|------------------------------------|----------------------------------|----------------|
| Awareness raising on malaria transmission                                             | 17 (60.7)                          | 17 (45.9)                        | 34 (52.3)      |
| Awareness raising on malaria prevention                                               | 7 (25.0)                           | 3 (8.1)                          | 10 (15.4)      |
| Awareness raising on both malaria transmission and prevention                         | 0                                  | 10 (27.0)                        | 10 (15.4)      |
| Entomological surveillance                                                            | 3 (10.7)                           | 1 (2.7)                          | 4 (6.2)        |
| Providing additional vector control if needed                                         | 1 (3.6)                            | 2 (5.4)                          | 3 (4.6)        |
| Spot check for mosquito breeding places if entomological surveillance is not feasible | 0                                  | 1 (2.7)                          | 1 (1.5)        |
| Awareness raising on malaria transmission, prevention and vector control              | 0                                  | 1 (2.7)                          | 1 (1.5)        |

\* Missing values present.

Additional table 6. Completeness and timeliness of reactive surveillance and response activities in Lao PDR during 2018-2022

| Reporting unit<br>(in alphabetical<br>order) | 2018                      |                                         |                                            |                                          | 2019                      |                                         |                                            |                                          | 2020                      |                                          |                                            |                                          | 2021                      |                                         |                                        |                           | 2022                      |                                      |                                        |                                           |
|----------------------------------------------|---------------------------|-----------------------------------------|--------------------------------------------|------------------------------------------|---------------------------|-----------------------------------------|--------------------------------------------|------------------------------------------|---------------------------|------------------------------------------|--------------------------------------------|------------------------------------------|---------------------------|-----------------------------------------|----------------------------------------|---------------------------|---------------------------|--------------------------------------|----------------------------------------|-------------------------------------------|
|                                              | Total<br>malaria<br>cases | Case<br>notification<br>within 1<br>day | Case<br>investigatio<br>n within 3<br>days | Foci<br>investigation<br>and<br>response | Total<br>malaria<br>cases | Case<br>notification<br>within 1<br>day | Case<br>investigatio<br>n within 3<br>days | Foci<br>investigation<br>and<br>response | Total<br>malaria<br>cases | Case<br>notificatio<br>n within 1<br>day | Case<br>investigatio<br>n within 3<br>days | Foci<br>investigation<br>and<br>response | Total<br>malaria<br>cases | Case<br>notification<br>within 1<br>day | Case<br>investigation<br>within 3 days | Foci<br>n and<br>response | Total<br>malaria<br>cases | Case<br>notification<br>within 1 day | Case<br>investigation<br>within 3 days | Foci<br>investigati<br>on and<br>response |
|                                              | n                         | n (%)                                   | n (%)                                      | n*                                       | n                         | n (%)                                   | n (%)                                      | n*                                       | n                         | n (%)                                    | n (%)                                      | n*                                       | n                         | n (%)                                   | n (%)                                  | n*                        | n                         | n (%)                                | n (%)                                  | n                                         |
| Bokeo                                        | 0                         |                                         |                                            |                                          | 0                         |                                         |                                            |                                          | 0                         |                                          |                                            |                                          | 0                         |                                         |                                        |                           | 0                         |                                      |                                        |                                           |
| Bolikhambxai                                 | 5                         | 0 (0.0%)                                | 0 (0.0%)                                   | 0                                        | 1                         | 0 (0.0%)                                | 1 (100.0%)                                 | 0                                        | 2                         | 0 (0.0%)                                 | 2 (100.0%)                                 | 2                                        | 1                         | 1 (100.0%)                              | 1 (100.0%)                             | 0                         | 1                         | 1 (100.0%)                           | 1 (100.0%)                             | 0                                         |
| Champasak                                    | 0                         |                                         |                                            |                                          | 0                         |                                         |                                            |                                          | 0                         |                                          |                                            |                                          | 6                         | 6 (100.0%)                              | 6 (100.0%)                             | 0                         | 48                        | 46 (95.8%)                           | 47 (97.9%)                             | 6                                         |
| Houaphan                                     | 0                         |                                         |                                            |                                          | 0                         |                                         |                                            |                                          | 1                         | 0 (0.0%)                                 | 1 (100.0%)                                 | 0                                        | 0                         |                                         |                                        |                           | 0                         |                                      |                                        |                                           |
| Khammouan                                    | 138                       | 0 (0.0%)                                | 11 (8.0%)                                  | 6                                        | 49                        | 0 (0.0%)                                | 40 (81.6%)                                 | 2                                        | 183                       | 1 (0.5%)                                 | 147 (80.3%)                                | 13                                       | 90                        | 88 (97.8%)                              | 90 (100.0%)                            | 16                        | 40                        | 40 (100.0%)                          | 40 (100.0%)                            | 14                                        |
| Louangnamtha                                 | 1                         | 0 (0.0%)                                | 0 (0.0%)                                   | 0                                        | 1                         | 0 (0.0%)                                | 0 (0.0%)                                   | 0                                        | 1                         | 0 (0.0%)                                 | 1 (100.0%)                                 | 1                                        | 0                         |                                         |                                        |                           | 0                         |                                      |                                        |                                           |
| Louangphabang                                | 5                         | 0 (0.0%)                                | 1 (20.0%)                                  | 1                                        | 5                         | 0 (0.0%)                                | 4 (80.0%)                                  | 1                                        | 14                        | 0 (0.0%)                                 | 14 (100.0%)                                | 1                                        | 4                         | 1 (25.0%)                               | 1 (25.0%)                              | 0                         | 0                         |                                      |                                        |                                           |
| Oudomxai                                     | 4                         | 0 (0.0%)                                | 2 (50.0%)                                  | 1                                        | 0                         |                                         |                                            |                                          | 0                         |                                          |                                            |                                          | 0                         |                                         |                                        |                           | 1                         | 1 (100.0%)                           | 1 (100.0%)                             | 1                                         |
| Phongsali                                    | 82                        | 0 (0.0%)                                | 25 (30.5%)                                 | 15                                       | 3                         | 1 (33.3%)                               | 2 (66.7%)                                  | 1                                        | 0                         |                                          |                                            |                                          | 0                         |                                         |                                        |                           | 0                         |                                      |                                        |                                           |
| Salavan                                      | 0                         |                                         |                                            |                                          | 0                         |                                         |                                            |                                          | 0                         |                                          |                                            |                                          | 2                         | 2 (100.0%)                              | 2 (100.0%)                             | 0                         | 8                         | 7 (87.5%)                            | 8 (100.0%)                             | 5                                         |
| Savannakhet                                  | 0                         |                                         |                                            |                                          | 0                         |                                         |                                            |                                          | 0                         |                                          |                                            |                                          | 2                         | 2 (100.0%)                              | 2 (100.0%)                             | 1                         | 38                        | 38 (100.0%)                          | 37 (97.4%)                             | 30                                        |
| Vientiane                                    | 5                         | 0 (0.0%)                                | 0 (0.0%)                                   | 0                                        | 2                         | 0 (0.0%)                                | 2 (100.0%)                                 | 0                                        | 1                         | 0 (0.0%)                                 | 0 (0.0%)                                   | 0                                        | 1                         | 1 (100.0%)                              | 1 (100.0%)                             | 1                         | 0                         |                                      |                                        |                                           |
| Vientiane Capital                            | 9                         | 0 (0.0%)                                | 0 (0.0%)                                   | 0                                        | 9                         | 0 (0.0%)                                | 3 (33.3%)                                  | 1                                        | 1                         | 0 (0.0%)                                 | 1 (100.0%)                                 | 0                                        | 1                         | 1 (100.0%)                              | 1 (100.0%)                             | 0                         | 5                         | 5 (100.0%)                           | 5 (100.0%)                             | 1                                         |
| Xainyabouli                                  | 3                         | 0 (0.0%)                                | 0 (0.0%)                                   | 0                                        | 3                         | 0 (0.0%)                                | 1 (33.3%)                                  | 1                                        | 4                         | 0 (0.0%)                                 | 4 (100.0%)                                 | 1                                        | 0                         |                                         |                                        |                           | 1                         | 1 (100.0%)                           | 1 (100.0%)                             | 0                                         |
| Xaisomboun                                   | 4                         | 0 (0.0%)                                | 0 (0.0%)                                   | 0                                        | 3                         | 0 (0.0%)                                | 3 (100.0%)                                 | 0                                        | 0                         |                                          |                                            |                                          | 0                         |                                         |                                        |                           | 0                         |                                      |                                        |                                           |
| Xekong                                       | 0                         |                                         |                                            |                                          | 0                         |                                         |                                            |                                          | 0                         |                                          |                                            |                                          | 0                         |                                         |                                        |                           | 3                         | 3 (100.0%)                           | 3 (100.0%)                             | 2                                         |
| Xiangkhouang                                 | 1                         | 0 (0.0%)                                | 1 (100.0%)                                 | 0                                        | 1                         | 0 (0.0%)                                | 1 (100.0%)                                 | 0                                        | 0                         |                                          |                                            |                                          | 1                         | 1 (100.0%)                              | 1 (100.0%)                             | 1                         | 2                         | 2 (100.0%)                           | 2 (100.0%)                             | 0                                         |
| Total                                        | 257                       | 0 (0.0%)                                | 40 (15.6%)                                 | 23                                       | 77                        | 1 (1.3%)                                | 57 (74.0%)                                 | 6                                        | 207                       | 1 (0.5%)                                 | 170 (82.1%)                                | 18                                       | 108                       | 103 (95.4%)                             | 105 (97.2%)                            | 19                        | 147                       | 144 (98.0%)                          | 145 (98.6%)                            | 59                                        |

\* Foci investigation and response activities are not necessary for every positive case and hence percentages were not calculated.

**Additional table 7. Barriers for RASR activities in Lao PDR as reported by surveyed participants**

| RASR activity                                               | Malaria<br>program<br>stakeholder<br>(N=28) | Malaria<br>service<br>providers<br>(N=37) | Overall<br>(N=65) |
|-------------------------------------------------------------|---------------------------------------------|-------------------------------------------|-------------------|
| <b>Case notification within 1 day, n (%)</b>                |                                             |                                           |                   |
| No barriers present                                         | 9 (32.1)                                    | 20 (54.1)                                 | 29 (44.6)         |
| Otherwise                                                   | 19 (67.9)                                   | 17 (45.9)                                 | 36 (55.4)         |
| <b>Case investigation within 3 days, n (%)</b>              |                                             |                                           |                   |
| No barriers present                                         | 11 (39.3)                                   | 22 (59.5)                                 | 33 (50.8)         |
| Otherwise                                                   | 17 (60.7)                                   | 15 (40.5)                                 | 32 (49.2)         |
| <b>Foci investigation and response within 7 days, n (%)</b> |                                             |                                           |                   |
| No barriers present                                         | 6 (21.4)                                    | 20 (54.1)                                 | 26 (40.0)         |
| Otherwise                                                   | 22 (78.6)                                   | 17 (45.9)                                 | 39 (60.0)         |

**Additional table 8. Telecommunication barrier for RASR activities in Lao PDR as reported by surveyed participants**

| Telecommunication barrier to conduct                 | Malaria<br>program<br>stakeholder<br>(N=28) | Malaria<br>service<br>providers<br>(N=37) | Overall<br>(N=65) |
|------------------------------------------------------|---------------------------------------------|-------------------------------------------|-------------------|
| Case notification within 1 day, n (%)                | 18 (64.3)                                   | 6 (16.2)                                  | 24 (36.9)         |
| Case investigation within 3 days, n (%)              | 2 (7.1)                                     | 1 (2.7)                                   | 3 (4.6)           |
| Foci investigation and response within 7 days, n (%) | 0 (0.0)                                     | 1 (2.7)                                   | 1 (1.5)           |
